# Supplementary material for: Efficiency of IoT Adoption and Supply Chain Optimization: An Empirical Evidence from Nigeria
Source: Preprints.org preprint supplement (doi:10.20944/preprints202410.1582.v1), 2024-10-21
Supplement: Supplementary file 1 [file supplementary]

**Questionnaire**

**Section A: Demographic Information**

1. **Company Name:**

Bestie Noodles

Emzor)

Jumia

Olam Nigeria, Obasanjo Farms

DHL

1. **Sector:**

Food Supply Chain (Bestie Noodles)

Pharmaceutical/Healthcare Supply Chain (Emzor)

Online Retail/Consumers Supply Chain (Jumia)

Agricultural Supply Chain (Olam Nigeria, Obasanjo Farms)

Transportation (DHL)

1. **Position in the Company:**

Senior Supply Chain Manager

IT Manager

Operations Manager

Other (Please specify): ___________

1. **Years of Experience in the Industry:**

Less than 5 years

5-10 years

11-15 years

More than 15 years

1. **Size of the Company (Number of Employees):**

Less than 50

50-200

201-500

More than 500

1. **Section B: IoT Adoption 6. Has your company adopted IoT technologies in its supply chain operations?**

Yes

No (If No, skip to Section D)

1. **If Yes, which of the following IoT applications are implemented in your company's supply chain? (Select all that apply)**

Real-time tracking of inventory

Automated warehouse management

Smart sensors for equipment maintenance

IoT-based demand forecasting

Real-time monitoring of goods in transit

IoT-enabled supply chain analytics

Other (Please specify): ___________

1. **What was the primary motivation for adopting IoT technologies in your supply chain?**

Improving operational efficiency

Reducing costs

Enhancing customer service

Gaining competitive advantage

Regulatory compliance

Other (Please specify): ___________

1. **To what extent has your company integrated IoT into its supply chain operations?**

Fully integrated across all supply chain processes

Partially integrated in selected processes

In the pilot/testing phase

Planning to integrate in the future

No plans to integrate

1. **Section C: Impact on Supply Chain Efficiency 10. Since adopting IoT, how has the following supply chain metric changed?**
   (Rate on a scale of 1-5, where 1 = No Improvement, 5 = Significant Improvement)

**Lead time (Time from order to delivery):**

1

2

3

4

5

**Inventory turnover (Frequency of inventory replacement):**

1

2

3

4

5

**Order accuracy (Percentage of orders delivered without errors):**

1

2

3

4

5

**Operational cost efficiency:**

1

2

3

4

5

**Customer satisfaction:**

1

2

3

4

5

1. **What challenges has your company faced in adopting IoT technologies? (Select all that apply)**

High implementation costs

Lack of skilled personnel

Inadequate technological infrastructure

Security and privacy concerns

Resistance to change within the organisation

Regulatory issues

Other (Please specify): ___________

1. **What benefits has your company observed as a result of IoT adoption? (Select all that apply)**

Reduced lead times

Increased inventory turnover

Improved order accuracy

Enhanced operational efficiency

Better decision-making capabilities

Increased customer satisfaction

Other (Please specify): ___________

1. **Section D: Future Prospects and Recommendations 13. What future IoT applications do you believe could further enhance your company’s supply chain efficiency?**

Advanced predictive analytics

AI-driven automation

Blockchain for supply chain transparency

Autonomous vehicles and drones

IoT-enabled customer engagement tools

Other (Please specify): ___________

**Do you believe that government policy and infrastructure development can play a role in enhancing IoT adoption in Nigeria?**

Yes

No

Maybe (Please elaborate): ___________
